# Supplementary material for: Quantitative Analysis of Food and Feed Samples with Droplet Digital PCR
Source: PLoS One. 2013 May 2;8(5):e62583. doi: 10.1371/journal.pone.0062583 (PMC3642186; doi:10.1371/journal.pone.0062583)
Supplement: Appendix S2 — Table S8. Inhibition effect on MON810 quantification in qPCR and ddPCR. Table S9. Set-up and number of reactions needed for simultaneous quantification of four samples with qPCR and ddPCR. Table S10. Time needed for quantification with qPCR and ddPCR. Table S11. Set-up and number of reactions needed for simultaneous quantification of 23 samples with qPCR and ddPCR. Table S12. Set-up and number of reactions needed for quantification with qPCR and ddPCR (full 96 well-plate). (XLS) [file pone.0062583.s010.xls]

## Sheet: S-8
Table S-8: Inhibition effect on MON810 quantification in qPCR and ddPCR
Sample name	Target value (from qPCR)	Average %Mon810 (ddPCR)	Cv %Mon810 (ddPCR)	Cv between CTAB and NSF in series (qPCR )	Cv between CTAB and NSF in series (ddPCR)	Cv%Mon810 between dilutions (qPCR)	Cv%Mon810 between dilutions (ddPCR)	Bias with target in series
G147/08 CTAB 1x*	29.6	21.696	7.42656	36.5336	4.61245	3.17591	0.881575	-26.7028	*
G147/08 CTAB 3x	30.96	21.4272	13.5092	8.78122	5.03484			-30.7908
G147/08 NSF 1x	50.22	20.3255	0.989137			41.7189	1.30444	-59.5272
G147/08 NSF 3x*	27.34	19.9539	6.83677					-27.0156	*
G254/11 1x	5.64	3.40617	2.86394			27.2079	1.28413	-39.607
G254/11 4x*	3.82	3.46859	0.722629					-9.19919	*
Highlighted in grey are values with cv >25% or bias >25%
* dilution used for MON810 quantification using qPCR (absence of inhibition)
Headers definitions:
Sample name: two dilutions of each DNA sample are used. Samples are described in Table 1 and Table S-1.
Target value (from qPCR): MON810 content determiined by qPCR (in absence of certified value).
Average %Mon810 (ddPCR): average MON810 content measured by ddPCR
Cv %Mon810 (ddPCR): coefficient of variability of the measured ddPCR values. Expressed as a percentage.
Cv between CTAB and NSF in series (qPCR ): coefficient of variability between the qPCR MON810 content measured on DNA extracted with the CTAB and the NSF methods. Measured for each dilution. Expressed as a percentage.
Cv between CTAB and NSF in series (ddPCR): coefficient of variability between the qPCR MON810 content measured on DNA extracted with the CTAB and the NSF methods. Measured for each dilution. Expressed as a percentage.
Cv%Mon810 between dilutions (qPCR): coefficient of variability between the MON810 content measured by qPCR in each dilution. Expressed as a percentage. Values above 25% highlight the presence of inhibition in the less diluted sample.
Cv%Mon810 between dilutions (ddPCR): coefficient of variability between the MON810 content measured by ddPCR in each dilution. Expressed as a percentage. Values above 25% highlight the presence of inhibition in the less diluted sample.
Bias with target in series: bias of the MON810 content measured by ddPCR with the qPCR values. Values above 25% highlight a significant difference.

## Sheet: S-9
Table S-9: Set-up and number of reactions needed for simulateous quantification of four samples with qPCR and ddPCR
A: For qPCR (in 96 well-plate) according to routine accredited procedure
Type of reaction	Description	Number of reactions	Price/96 well plate (€)	Price/ sample (€)	Price/ sample (US$)
Standard curve	At least 5 target concentration, duplicates	10
Control of quantification	One sample with known target content. Two dilutions (to test inhibition). Duplicate	4
NTC	Non target control. At the beginning and the end of the set-up	2
Sample	Two parallels of extraction tested. 2 dilutions for each, in duplicate.	8
Total 1 sample	Singleplex qPCR assays so one series for hmg, one for MON810	48
Total 2 samples	No need to repeat the controls, NTC and standard curve.	64
Total 3 samples	No need to repeat the controls, NTC and standard curve.	80
Total 4 samples	No need to repeat the controls, NTC and standard curve.	96	68.4
				17.1	22.2916
B: For ddPCR (amplification in a 96-well plate) - set-up 1 (2 parallels - ISO21570, 2 points/ parallel )
Type of reaction	Description	Number of reactions	Price/96 well plate	Price/ sample (€)	Price/ sample (US$)
Standard curve	Not needed	0
Control of quantification	One sample with known target content. One dilution. Duplicate	2
NTC	Non target control. At the beginning and the end of the set-up	2
Sample	Both parallels of extraction tested. Duplicate.	4
Total 1 sample	Duplex ddPCR assay. One parallel of extraction/cartdrige	8
Total 2 samples	Both parallels of extraction tested. Duplicate.	12
Total 3 samples	Both parallels of extraction tested. Duplicate.	16
Total 4 samples	Both parallels of extraction tested. Duplicate.	20	64
				16	20.8576
Prices include reagents and consumables as well as labor worked observed at the authors' institution.
US/EUR exchange rate	date: 18/09/2012
0.767106
Headers definitions:
Number of reactions: Number of PCR reactions needed to fulfill the ISO21570 requirements.
Total X sample(s): Takes into account the number of reactions needed for X sample(s), including the standard curve, the control of quantification and NTC.
	Note that on one plate, the number of data point for the standard curve, control of quantification and NTC is fixed and only the number of data points for the samples will vary depending on the X number of samples.
Price/96 well plate: Price calculated in euros for the use of a 96 well containing PCR reactions for X samples. It is proportional to the number of reactions to be performed.
Price/sample: depends on the price/96 well plate and the number of samples analysed on this plate.

## Sheet: S-10
	Table S-10: Time needed for quantification with qPCR and ddPCR
	(based on authors' own experience)
	Hands on time
			qPCR		ddPCR
			96 reactions (4samples)		96 reactions (23 samples)		20 reactions (4 samples)
	Number reactions		96		96		20
	work (time) estimate	Time/step (min)	amount	unit	amount	unit	amount	unit
	Pipetting on cartridge (ddPCR)	3	0	min	36	min	9	min
	Pipetting on 96w plate	0.25	24	min	9	min	2.25	min
	PCR preparation	5	5	min	5	min	5	min
	droplet reader machine set-up (wash machine, transfer plate, set-up program)	5	0	min	5	min	5	min
	analysis (treshold)	5	5	min	5	min	5	min
	data export, storage	10	10	min	5	min	5	min
	sum hands on time		44	min	65	min	31.25	min
			0.733333	h	1.08333	h	0.520833	h
	Total time
			qPCR		ddPCR
			96 reactions (4samples)		96 reactions (23 samples)		20 reactions (4 samples)
	Number reactions		96		96		20
	work (time) estimate	Time/step (min)	amount	unit	amount	unit	amount	unit
	Pipetting on cartridge (ddPCR)	3	0	min	36	min	9	min
	Droplet generation	2.5	0	min	30	min	7.5	min
	Pipetting on 96w plate	0.25	24	min	9	min	2.25	min
	Plate centrifugation	2	2	min	0	min	0	min
	PCR	120	120	min	120	min	120	min
	droplet reader machine set-up (wash machine, transfer plate, set-up program)	5	0	min	5	min	5	min
	reading droplets (38 wells/hour)	60	0	min	151.579	min	31.5789	min
	analysis (treshold)	5	5	min	5	min	5	min
	data export, storage	10	10	min	5	min	5	min
	sum total time		161	min	361.579	min	185.329	min
			2.68333	h	6.02632	h	3.08882	h

## Sheet: S-11
Table S-11: Set-up and number of reactions needed for simulateous quantification of 23 samples with qPCR and ddPCR
A: For qPCR (in 96 well-plate) according to routine accredited procedure
Type of reaction	Description	Number of reactions	Price/96 well plate	Price/ sample (€)	Price/ sample (US$)
Standard curve	At least 5 target concentration, duplicates	10
Control of quantification	One sample with known target content. Two dilutions (to test inhibition). Duplicate	4
NTC	Non target control. At the beginning and the end of the set-up	2
Sample	Two parallels of extraction tested. 2 dilutions for each, in duplicate.	8
Total 1 sample	Singleplex qPCR assays so one series for hmg, one for MON810	48
Total 2 samples	No need to repeat the controls, NTC and standard curve.	64
Total 3 samples	No need to repeat the controls, NTC and standard curve.	80
Total 4 samples	No need to repeat the controls, NTC and standard curve.	96	68.4
Total 5 samples	New plate. No need to repeat the controls, NTC and standard curve.	112
Total 6 samples	No need to repeat the controls, NTC and standard curve.	128
Total 7 samples	No need to repeat the controls, NTC and standard curve.	144
Total 8 samples	No need to repeat the controls, NTC and standard curve.	160
Total 9 samples	No need to repeat the controls, NTC and standard curve.	176
Total 10 samples	No need to repeat the controls, NTC and standard curve.	192	68.4
Total 11 samples	New plate. No need to repeat the controls, NTC and standard curve.	208
Total 12 samples	No need to repeat the controls, NTC and standard curve.	224
Total 13 samples	No need to repeat the controls, NTC and standard curve.	240
Total 14 samples	No need to repeat the controls, NTC and standard curve.	256
Total 15 samples	No need to repeat the controls, NTC and standard curve.	272
Total 16 samples	No need to repeat the controls, NTC and standard curve.	288	68.4
Total 17 samples	New plate. No need to repeat the controls, NTC and standard curve.	304
Total 18 samples	No need to repeat the controls, NTC and standard curve.	320
Total 19 samples	No need to repeat the controls, NTC and standard curve.	336
Total 20 samples	No need to repeat the controls, NTC and standard curve.	352
Total 21 samples	No need to repeat the controls, NTC and standard curve.	368
Total 22 samples	No need to repeat the controls, NTC and standard curve.	384	68.4
Total 23 samples	New plate. No need to repeat the controls, NTC and standard curve.	400	19.57
				12.7465	16.6164
B: For ddPCR (amplification in a 96-well plate) - set-up 1 (2 parallels - ISO21570, 2 points/ parallel )
Type of reaction	Description	Number of reactions	Price/96 well plate	Price/ sample (€)	Price/ sample (US$)
Standard curve	Not needed	0
Control of quantification	One sample with known target content. One dilution. Duplicate	2
NTC	Non target control. At the beginning and the end of the set-up	2
Sample	Both parallels of extraction tested. Duplicate.	4
Total 1 sample	Duplex ddPCR assay. One parallel of extraction/cartdrige	8
Total 2 samples	Both parallels of extraction tested. Duplicate.	12
Total 3 samples	Both parallels of extraction tested. Duplicate.	16
Total 4 samples	Both parallels of extraction tested. Duplicate.	20
Total 5 samples	Both parallels of extraction tested. Duplicate.	24
Total 6 samples	Both parallels of extraction tested. Duplicate.	28
Total 7 samples	Both parallels of extraction tested. Duplicate.	32
Total 8 samples	Both parallels of extraction tested. Duplicate.	36
Total 9 samples	Both parallels of extraction tested. Duplicate.	40
Total 10 samples	Both parallels of extraction tested. Duplicate.	44
Total 11 samples	Both parallels of extraction tested. Duplicate.	48
Total 12 samples	Both parallels of extraction tested. Duplicate.	52
Total 13 samples	Both parallels of extraction tested. Duplicate.	56
Total 14 samples	Both parallels of extraction tested. Duplicate.	60
Total 15 samples	Both parallels of extraction tested. Duplicate.	64
Total 16 samples	Both parallels of extraction tested. Duplicate.	68
Total 17 samples	Both parallels of extraction tested. Duplicate.	72
Total 18 samples	Both parallels of extraction tested. Duplicate.	76
Total 19 samples	Both parallels of extraction tested. Duplicate.	80
Total 20 samples	Both parallels of extraction tested. Duplicate.	84
Total 21 samples	Both parallels of extraction tested. Duplicate.	88
Total 22 samples	Both parallels of extraction tested. Duplicate.	92
Total 23 samples	Both parallels of extraction tested. Duplicate.	96	261.47
				11.3683	14.8197
Prices include reagents and consumables as well as labor worked observed at the authors' institution.
US/EUR exchange rate	date: 18/09/2012
0.767106
Headers definitions:
Number of reactions: Number of PCR reactions needed to fulfill the ISO21570 requirements.
Total X sample(s): Takes into account the number of reactions needed for X sample(s), including the standard curve, the control of quantification and NTC.
	Note that on one plate, the number of data point for the standard curve, control of quantification and NTC is fixed and only the number of data points for the samples will vary depending on the X number of samples.
Price/96 well plate: Price calculated in euros for the use of a 96 well containing PCR reactions for X samples. It is directly to the number of reactions to be performed. For qPCR, several plates are needed to perform the full analysis.
Price/sample: depends on the price/96 well plate and the number of samples analysed on this plate.

## Sheet: S-12
Table S-12: Set-up and number of reactions needed for quantification with qPCR and ddPCR (full 96 well-plate)
A: For qPCR (in 96 well-plate) according to routine accredited procedure
Type of reaction	Description	Number of reactions	Price/96 well plate	Price/ sample (€)	Price/ sample (US$)
Standard curve	At least 5 target concentration, duplicates	10
Control of quantification	One sample with known target content. Two dilutions (to test inhibition). Duplicate	4
NTC	Non target control. At the beginning and the end of the set-up	2
Sample	Two parallels of extraction tested. 2 dilutions for each, in duplicate.	8
Total 1 sample	Singleplex qPCR assays so one series for hmg, one for MON810	48
Total 2 samples	No need to repeat the controls, NTC and standard curve.	64
Total 3 samples	No need to repeat the controls, NTC and standard curve.	80
Total 4 samples	No need to repeat the controls, NTC and standard curve.	96	68.38
				17.095	22.285
B: For ddPCR (amplification in a 96-well plate) - set-up 1 (2 parallels - ISO21570, 2 points/ parallel )
Type of reaction	Description	Number of reactions	Price/96 well plate	Price/ sample €	Price/ sample US$
Standard curve	Not needed	0
Control of quantification	One sample with known target content. One dilution. Duplicate	2
NTC	Non target control. At the beginning and the end of the set-up	2
Sample	Both parallels of extraction tested. Duplicate.	4
Total 1 sample	Duplex ddPCR assay. One parallel of extraction/cartdrige	8
Total 2 samples	Both parallels of extraction tested. Duplicate.	12
Total 3 samples	Both parallels of extraction tested. Duplicate.	16
Total 4 samples	Both parallels of extraction tested. Duplicate.	20
Total 5 samples	Both parallels of extraction tested. Duplicate.	24
Total 6 samples	Both parallels of extraction tested. Duplicate.	28
Total 7 samples	Both parallels of extraction tested. Duplicate.	32
Total 8 samples	Both parallels of extraction tested. Duplicate.	36
Total 9 samples	Both parallels of extraction tested. Duplicate.	40
Total 10 samples	Both parallels of extraction tested. Duplicate.	44
Total 11 samples	Both parallels of extraction tested. Duplicate.	48
Total 12 samples	Both parallels of extraction tested. Duplicate.	52
Total 13 samples	Both parallels of extraction tested. Duplicate.	56
Total 14 samples	Both parallels of extraction tested. Duplicate.	60
Total 15 samples	Both parallels of extraction tested. Duplicate.	64
Total 16 samples	Both parallels of extraction tested. Duplicate.	68
Total 17 samples	Both parallels of extraction tested. Duplicate.	72
Total 18 samples	Both parallels of extraction tested. Duplicate.	76
Total 19 samples	Both parallels of extraction tested. Duplicate.	80
Total 20 samples	Both parallels of extraction tested. Duplicate.	84
Total 21 samples	Both parallels of extraction tested. Duplicate.	88
Total 22 samples	Both parallels of extraction tested. Duplicate.	92
Total 23 samples	Both parallels of extraction tested. Duplicate.	96	261.47
				11.3683	14.8197
Prices include reagents and consumables as well as labor worked observed at the authors' institution.
US/EUR exchange rate	Date: 18/09/2012
0.767106
Headers definitions:
Number of reactions: Number of PCR reactions needed to fulfill the ISO21570 requirements.
Total X sample(s): Takes into account the number of reactions needed for X sample(s), including the standard curve, the control of quantification and NTC.
	Note that on one plate, the number of data point for the standard curve, control of quantification and NTC is fixed and only the number of data points for the samples will vary depending on the X number of samples.
Price/96 well plate: Price calculated in euros for the use of a 96 well containing PCR reactions for X samples. It is directly to the number of reactions to be performed. analysis.
Price/sample: depends on the price/96 well plate and the number of samples analysed on this plate.
