# Supplementary material for: Quantitative Analysis of Food and Feed Samples with Droplet Digital PCR
Source: PLOS journal article supplement (doi:10.1371/journal.pone.0062583), 2013-05-02
Supplement: S11 (10.1371/journal.pone.0062583.s011) [file journal.pone.0062583.s011]

MIQE checklist

| Item to check                                                        | Importance | Included? | Comments                                                                                                                                                                                                               |
|----------------------------------------------------------------------|------------|-----------|------------------------------------------------------------------------------------------------------------------------------------------------------------------------------------------------------------------------|
| <b>Experimental design</b>                                           |            |           |                                                                                                                                                                                                                        |
| Definition of experimental and control groups                        | E          | Yes       |                                                                                                                                                                                                                        |
| Number within each group                                             | E          | Yes       |                                                                                                                                                                                                                        |
| Assay carried out by the core or investigator's laboratory?          | D          | Yes       | Investigator's lab                                                                                                                                                                                                     |
| Acknowledgment of authors' contributions                             | D          | Yes       |                                                                                                                                                                                                                        |
| <b>Sample</b>                                                        |            |           |                                                                                                                                                                                                                        |
| Description                                                          | E          | Yes       |                                                                                                                                                                                                                        |
| Volume/mass of sample processed                                      | D          | Yes       |                                                                                                                                                                                                                        |
| Microdissection or macrodissection                                   | E          | No        | n.a.                                                                                                                                                                                                                   |
| Processing procedure                                                 | E          | No        | n.a.                                                                                                                                                                                                                   |
| If frozen, how and how quickly?                                      | E          | No        | n.a.                                                                                                                                                                                                                   |
| If fixed, with what and how quickly?                                 | E          | No        | n.a.                                                                                                                                                                                                                   |
| Sample storage conditions and duration (especially for FFPE samples) | E          | Yes       | All samples stored at -20°C                                                                                                                                                                                            |
| <b>Nucleic acid extraction</b>                                       |            |           |                                                                                                                                                                                                                        |
| Procedure and/or instrumentation                                     | E          | Yes       |                                                                                                                                                                                                                        |
| Name of kit and details of any modifications                         | E          | Yes       |                                                                                                                                                                                                                        |
| Source of additional reagents used                                   | D          | Yes       |                                                                                                                                                                                                                        |
| Details of DNase or RNase treatment                                  | E          | No        | n.a.                                                                                                                                                                                                                   |
| Contamination assessment (DNA or RNA)                                | E          | No        | n.a.                                                                                                                                                                                                                   |
| Nucleic acid quantification                                          | E          | Yes       |                                                                                                                                                                                                                        |
| Instrument and method                                                | E          | Yes       |                                                                                                                                                                                                                        |
| Purity (A260/A280)                                                   | D          | No        | n.a.                                                                                                                                                                                                                   |
| Yield                                                                | D          | No        | n.a.                                                                                                                                                                                                                   |
| RNA integrity: method/instrument                                     | E          | No        | n.a.                                                                                                                                                                                                                   |
| RIN/RQI or Cq of 3. and 5. transcripts                               | E          | No        | n.a.                                                                                                                                                                                                                   |
| Electrophoresis traces                                               | D          | No        | n.a.                                                                                                                                                                                                                   |
| Inhibition testing (Cq dilutions, spike, or other)                   | E          | Yes       | Cq dilutions                                                                                                                                                                                                           |
| <b>Reverse transcription</b>                                         |            |           |                                                                                                                                                                                                                        |
| Complete reaction conditions                                         | E          | No        | n.a.                                                                                                                                                                                                                   |
| Amount of RNA and reaction volume                                    | E          | No        | n.a.                                                                                                                                                                                                                   |
| Priming oligonucleotide (if using GSP) and concentration             | E          | No        | n.a.                                                                                                                                                                                                                   |
| Reverse transcriptase and concentration                              | E          | No        | n.a.                                                                                                                                                                                                                   |
| Temperature and time                                                 | E          | No        | n.a.                                                                                                                                                                                                                   |
| Manufacturer of reagents and catalogue numbers                       | D          | No        | n.a.                                                                                                                                                                                                                   |
| Cqs with and without reverse transcription                           | D          | No        | n.a.                                                                                                                                                                                                                   |
| Storage conditions of cDNA                                           | D          | No        | n.a.                                                                                                                                                                                                                   |
| <b>qPCR target information</b>                                       |            |           |                                                                                                                                                                                                                        |
| Gene symbol                                                          | E          | Yes       | HMG1. n.a. for MON810 target                                                                                                                                                                                           |
| Sequence accession number                                            | E          | Yes       | AJ131373 ( <i>hmg</i> ), AF434709 (MON810)<br>719 - 797 (intron 4 on acc. AJ131373 -hmg), 767 - 868 (junction region on acc. AF434709 -MON810)                                                                         |
| Location of amplicon                                                 | D          | No        | AF434709 -MON810                                                                                                                                                                                                       |
| Amplicon length                                                      | E          | Yes       | 79bp ( <i>hmg</i> ), 92 bp (MON810)                                                                                                                                                                                    |
|                                                                      |            |           | Blastn: amplicon aligns only on Zea mays hmgA gene (AJ131373) and a reference plasmid (JX434027) ( <i>hmg assay</i> ), and on transgenic maize (acc. No JQ406879 and AF434709) (MON810 assay)                          |
| In silico specificity screen (BLAST, and so on)                      | E          | Yes       |                                                                                                                                                                                                                        |
| Pseudogenes, retropseudogenes, or other homologs?                    | D          | Yes       | not found                                                                                                                                                                                                              |
| Sequence alignment                                                   | D          | No        |                                                                                                                                                                                                                        |
|                                                                      |            |           | mfold analysis of target sequence (50°C, 2.5 mM Mg2+, 50 mM Na+): 7 structures with deltaG from = -0.88 to -0.07 kcal/mol (for <i>hmg</i> ) and two structures with deltaG from = -3.89 to -3.63 kcal/mol (for MON810) |
| Secondary structure analysis of amplicon                             | D          | Yes       |                                                                                                                                                                                                                        |
| Location of each primer by exon or intron (if applicable)            | E          | Yes       | Both primers on intron 4 of acc. AJ131373 ( <i>hmg</i> )                                                                                                                                                               |
| What splice variants are targeted?                                   | E          | No        | n.a.                                                                                                                                                                                                                   |
| <b>qPCR oligonucleotides</b>                                         |            |           |                                                                                                                                                                                                                        |
| Primer sequences                                                     | E          | Yes       |                                                                                                                                                                                                                        |
| RTPrimerDB identification number                                     | D          | No        | n.a.                                                                                                                                                                                                                   |
| Probe sequences                                                      | D          | Yes       |                                                                                                                                                                                                                        |
| Location and identity of any modifications                           | E          | Yes       | Modification of the quenchers (BHQ1)                                                                                                                                                                                   |
| Manufacturer of oligonucleotides                                     | D          | Yes       | Eurofins MWG Operon                                                                                                                                                                                                    |
| Purification method                                                  | D          | Yes       | Desalting (HPSF®)                                                                                                                                                                                                      |
| <b>qPCR protocol</b>                                                 |            |           |                                                                                                                                                                                                                        |
| Complete reaction conditions                                         | E          | Yes       |                                                                                                                                                                                                                        |
| Reaction volume and amount of cDNA/DNA                               | E          | Yes       |                                                                                                                                                                                                                        |
| Primer, (probe), Mg2 &#1;, and dNTP concentrations                   | E          | Yes       |                                                                                                                                                                                                                        |
| Polymerase identity and concentration                                | E          | Yes       |                                                                                                                                                                                                                        |
| Buffer/kit identity and manufacturer                                 | E          | Yes       | Bio-Rad (Hercules, CA), cat#186-3010                                                                                                                                                                                   |
| Exact chemical composition of the buffer                             | D          | No        | Not disclosed by the manufacturer                                                                                                                                                                                      |
| Additives (SYBR Green I, DMSO, and so forth)                         | E          | No        | n.a.                                                                                                                                                                                                                   |
| Manufacturer of plates/tubes and catalog number                      | D          | Yes       | Eppendorf (Hamburg, Germany), cat. #0030 128.605                                                                                                                                                                       |
| Complete thermocycling parameters                                    | E          | Yes       |                                                                                                                                                                                                                        |
| Reaction setup (manual/robotic)                                      | D          | Yes       | Manual                                                                                                                                                                                                                 |
| Manufacturer of qPCR instrument                                      | E          | Yes       |                                                                                                                                                                                                                        |
| <b>qPCR validation</b>                                               |            |           |                                                                                                                                                                                                                        |
| Evidence of optimization (from gradients)                            | D          | No        | n.a.                                                                                                                                                                                                                   |
| Specificity (gel, sequence, melt, or digest)                         | E          | No        | n.a. (done in ring trial for qPCR assays)                                                                                                                                                                              |
| For SYBR Green I, Cq of the NTC                                      | E          | No        | n.a.                                                                                                                                                                                                                   |
| Calibration curves with slope and y intercept                        | E          | No        | n.a. for ddPCR (no standard curve).                                                                                                                                                                                    |
|                                                                      |            |           | n.a. for ddPCR (end-point, no standard curve needed)                                                                                                                                                                   |
| PCR efficiency calculated from slope                                 | E          | No        |                                                                                                                                                                                                                        |
| CIs for PCR efficiency or SE                                         | D          | No        | n.a. for ddPCR (end-point).                                                                                                                                                                                            |
| r2 of calibration curve                                              | E          | Yes       | 0.9990 ( <i>hmg</i> ) and 0.993 (MON810) in linear range                                                                                                                                                               |
| Linear dynamic range                                                 | E          | Yes       | From 5 to 118,000 copies ( <i>hmg</i> ), from 18 to 4340 copies (highest point measured for MON810)                                                                                                                    |
| Cq variation at LOD                                                  | E          | No        | n.a. for ddPCR (end-point, droplet count)                                                                                                                                                                              |
| CIs throughout range                                                 | D          | No        |                                                                                                                                                                                                                        |
| Evidence for LOD                                                     | E          | Yes       | At least two positive droplets detected in 5 x 20,000 droplets. LOD = 5 copies ( <i>hmg</i> ) and 6 copies (MON810)                                                                                                    |
| If multiplex, efficiency and LOD of each assay                       | E          | Yes       | LOD of each assay determined. Efficiency not determined (n.a. for ddPCR)                                                                                                                                               |
| <b>Data analysis</b>                                                 |            |           |                                                                                                                                                                                                                        |
| qPCR analysis program (source, version)                              | E          | Yes       |                                                                                                                                                                                                                        |
| Method of Cq determination                                           | E          | No        | n.a. Based on droplet count                                                                                                                                                                                            |
| Outlier identification and disposition                               | E          | Yes       |                                                                                                                                                                                                                        |
| Results for NTCs                                                     | E          | Yes       | 0% (n = 12)                                                                                                                                                                                                            |
| Justification of number and choice of reference genes                | E          | Yes       | Same as in validated qPCR assays                                                                                                                                                                                       |
| Description of normalization method                                  | E          | No        | n.a.                                                                                                                                                                                                                   |

|                                                                          |   |     |                                                  |
|--------------------------------------------------------------------------|---|-----|--------------------------------------------------|
| Number and concordance of biological replicates                          | D | Yes | cv analysis of the replicates                    |
| Number and stage (reverse transcription or qPCR) of technical replicates | E | Yes |                                                  |
| Repeatability (intraassay variation)                                     | E | Yes |                                                  |
| Reproducibility (interassay variation, CV)                               | D | No  | n.a. (done in only one laboratory and istrument) |
| Power analysis                                                           | D | No  |                                                  |
| Statistical methods for results significance                             | E | Yes | Via cv analysis.                                 |
| Software (source, version)                                               | E | Yes | Excel spreadsheet                                |
| Cq or raw data submission with RDML                                      | D | No  |                                                  |

Checklist from Bustin *et al.* Clinical Chemistry 55:4 611–622 (2009) showing (E) essential and (D) desirable information to be included in research reports using qPCR.

\* Information not provided in this work but reference is made to original publication for the validation of the qPCR assays. [http://gmo-crl.jrc.ec.europa.eu/summaries/Mon810\\_validation\\_report.pdf](http://gmo-crl.jrc.ec.europa.eu/summaries/Mon810_validation_report.pdf)  
n.a. : not applicable to the study.
